# Supplementary material
Source: HighWire-hosted journal article supplement (https://qualitysafety.bmj.com/highwire/filestream/147505/field_highwire_adjunct_files/0/bmjqs-2014-003432supp.pdf)
Supplement: bmjqs-2014-003432supp.pdf [file bmjqs-2014-003432supp.pdf]

## Expanded List of Triggers Used to Detect Adverse Events

| Triggers from the Institute for Healthcare Improvement Global Trigger Tool            |                                            |                                                         |
|---------------------------------------------------------------------------------------|--------------------------------------------|---------------------------------------------------------|
| Abrupt Drop in Hemoglobin (>25%)                                                      | Fall                                       | Rapid Response Team Activation                          |
| Anti-emetic Use                                                                       | Glucagon or Dextrose (D50W) Administration | Readmission to Hospital Within 30 days                  |
| New <i>Clostridium difficile</i> Infection                                            | Hypoglycemia (Blood Glucose < 3 mmol/l)    | Restraint Use                                           |
| Blood Culture Positive                                                                | INR > 4                                    | Transfer to Higher Level of Care (e.g., Intensive Care) |
| Blood Transfusion                                                                     | MRSA Positive Status Newly Acquired        | Troponin Elevation (>1.0 µg/L)                          |
| Code Blue Called                                                                      | Naloxone Administration                    | Unplanned Medication Stop                               |
| Creatinine increase by 100 µmol/L from baseline or double                             | Pneumonia (hospital-acquired)              | Urea increase by 10 mmol/L from baseline or double      |
| Delirium                                                                              | Pressure Ulcer                             | Urine Culture Positive                                  |
| Deep Vein Thrombosis or Pulmonary Embolism Following Admission                        | Procedural Complication                    | Vitamin K Administration                                |
| Electrolyte Abnormality (Na < 120 mmol/L or 150 mmol/L, K < 2.5 mmol/L or 6.5 mmol/L) |                                            | VRE Positive Status Newly Acquired                      |

**New Triggers Added to Enhance the Trigger Tool\***

|                                                                                                                                                                                              |                                                                                                                                                                                                                                     |                                               |                                                                                          |
|----------------------------------------------------------------------------------------------------------------------------------------------------------------------------------------------|-------------------------------------------------------------------------------------------------------------------------------------------------------------------------------------------------------------------------------------|-----------------------------------------------|------------------------------------------------------------------------------------------|
| Abnormal Vital Signs<br>(Heart rate > 120 beats per minute or < 40 beats per minute; Systolic blood pressure < 80 mmHg or > 200 mmHg; Temperature > 38°C or < 35°C; Oxygen saturation < 88%) | Concern brought forward by healthcare team member otherwise undiscoverable by medical record review (loss of mobility, constipation, decrease oral intake, family concern, missed issue on handover, difficulty reaching physician) | Enema or Suppository (new order)              | PRN Antipsychotic Medication Administration                                              |
| Abdominal X-Ray                                                                                                                                                                              | Chest X-Ray                                                                                                                                                                                                                         | Foley Catheter Insertion (re-inserted or new) | PRN Psycotropic Medication Order (Benzodiazepine or Antipsychotic)                       |
| Alternate Level of Care (ALC) conversion back to acute status                                                                                                                                | Consult to a Non Medical Service (48 hr after admission and beyond)                                                                                                                                                                 | Intravenous Fluid (Re)-initiated              | Rehabilitation, Palliative Care or Long-Term Care Application                            |
| Antibiotic Initiation during admission (greater than 12 hours after admission)                                                                                                               | Diet Texture Downgrade                                                                                                                                                                                                              | New antidepressant administration             | Safety Report                                                                            |
| Arterial Blood Gas Performed                                                                                                                                                                 | Dietary Supplement (new order)                                                                                                                                                                                                      | New Isolation Status                          | Unanticipated Death (nothing about the severity of illness that made the death expected) |
| AST / ALT increase x 3 or > 500 U/L                                                                                                                                                          | Dietician or SLP referral                                                                                                                                                                                                           | NPO > 2 days                                  | Urinary retention                                                                        |

|                               |                             |                                   |                                            |
|-------------------------------|-----------------------------|-----------------------------------|--------------------------------------------|
| Bicarbonate level < 15 mmol/L | Electrocardiogram Performed | Pharmacy Medication Clarification | White Blood Cell > 12 x 10 <sup>9</sup> /L |
|-------------------------------|-----------------------------|-----------------------------------|--------------------------------------------|

Abbreviations: NPO – nil per os (nothing by mouth), MRSA – methicillin resistant *Staphylococcus aureus*, INR – International normalized ratio, VRE – vancomycin resistant *Enterococcus*, AST - Aspartate Aminotransferase, ALT - Alanine Aminotransferase, SLP – speech language pathologist, PRN – *pro re nata* (as needed),

\* We piloted new triggers and adjusted them to balance feasibility of detection with likelihood of uncovering actual events. For example, when developing the new trigger to detect in-hospital malnutrition, we initially used “suboptimal oral intake documented in the medical record for greater than 72 hours” and “team concern about patient’s oral intake” as triggers, but quickly discovered that front-line staff inconsistently documented dietary intake in the medical record. However, we noticed that physicians often “ordered nutritional supplements” and made “referrals to the dietician” for patients with poor oral intake, and so we eventually used these triggers in our study.
